# Supplementary material for: Cell generation dynamics underlying naive T-cell homeostasis in adult humans
Source: PLoS Biol. 2019 Oct 29;17(10):e3000383. doi: 10.1371/journal.pbio.3000383 (PMC6818757; doi:10.1371/journal.pbio.3000383)
Supplement: S1 Data — PBMC, peripheral blood mononuclear cell. (XLSX) [file pbio.3000383.s012.xlsx]

## Sheet: Sheet1
%Ki67+ of subset
Sample:	Age	31-	31dim	31bright	CD4 SCM	CD4 CM	CD4 EM	CD4 EMRA	CD8 Naive	CD8 SCM
BC JEM1_006.fcs	64	0.015	0.022	0.024	1.73	1.25	3.73	1.24	0.02	2.39
BC JEM2_007.fcs	30	0.00784	0.00932	0.019	0.65	0.18	1.55	1.02	0.017	0.66
BC417_001.fcs	44	0.015	0.014	0.026	2.58	1.43	4.89	3.01	0.022	5.32
BC422_002.fcs	44	0.00895	0.00945	0.011	1.39	1.18	1.82	4.46	0.011	3.3
BC427_003.fcs	25	0.015	0.022	0.021	3.26	1.97	5.24	5.83	0.024	6.6
BC456_004.fcs	40	0.016	0.015	0.024	1.93	0.76	2.58	4.21	0.011	3.49
BC490_005.fcs	36	0.00865	0.012	0.016	0.74	1.19	4.38	1.1	0.02	1.29
OLD6_008.fcs	69	0.00306	0.014	0.021	0.82	0.81	4.72	3.9	0.00993	1.04
OLD7_009.fcs	68	0.023	0.013	0.031	0.67	0.74	3.6	2.65	0.02	1.37
OLD8_010.fcs	56	0.00435	0.015	0.029	0.64	0.22	1.79	1.12	0.022	0.41
