# Supplementary material for: Cell generation dynamics underlying naive T-cell homeostasis in adult humans
Source: PLoS Biol. 2019 Oct 29;17(10):e3000383. doi: 10.1371/journal.pbio.3000383 (PMC6818757; doi:10.1371/journal.pbio.3000383)
Supplement: S5 Table — (XLSX) [file pbio.3000383.s010.xlsx]

## Sheet: Sheet1
Table S2: Markers used for Mass Cytometry experiment
Marker	Metal	DVS/In-house	Clone
CD45	89Y	Fluidigm	HI30
CD235a/b	113In	In-house coupled	HIR2
CD57	115In	In-house coupled	HCD57
CD19	142Nd	Fluidigm	HIB19
CD5	143Nd	Fluidigm	UCHT2
CD195 (CCR5)	144Nd	Fluidigm	NP-6G4
CD4	145Nd	Fluidigm	RPA-T4
CD8a	146Nd	Fluidigm	RPA-T8
CD31	148Nd	In-house coupled	WM59
CD11c	147Sm	Fluidigm	Bu15
p4E-BP1 (Thr37/46)	149Sm	Fluidigm	236B4
pSTAT5 (Tyr694)	150Nd	Fluidigm	C71E5
CD278, ICOS	151Eu	Fluidigm	DX29
pAkt[pS473]	152Sm	Fluidigm	D9E
pSTAT1 (Tyr701)	153Eu	Fluidigm	58D6
CD3e	154Sm	Fluidigm	UCHT1
CD27	155Gd	Fluidigm	L128
pSLP-76	156Gd	Fluidigm	J141-668.36.58
pSTAT3 (Tyr705)	158Gd	Fluidigm	D3A7
pMAPKAP2 (Thr334)	159Tb	Fluidigm	27B7
CD28	160Gd	In-house coupled	CD28.2
CCR7/CD197	161Dy	In-house coupled	G043H7
pLck	162Dy	Fluidigm	pLck 4/Lck Y505
HLA-DR	163Dy	In-house coupled	L243
CD127	165Ho	Fluidigm	A019D5
pNFkBp65 [pS529]	166Er	Fluidigm	K10x
pERK12[202/204]	167Er	Fluidigm	D1314.4E
CD38	168Er	Fluidigm	HIT2
CD45RA	169Tm	Fluidigm	HI100
CD152 (CTLA-4)	170Er	Fluidigm	14D3
pZAP70(319)/Syk(352)	171Yb	Fluidigm	17A
CD45RB	172Yb	In-house coupled	MEM-55
CD39	173Yb	In-house coupled	A1
CD185 (CXCR5)	174Yb	In-house coupled	51505
p-S6 (Ser235/Ser236)	175Lu	Fluidigm	D57.2.2.E
pCREB	176Yb	Fluidigm	87G3
